# Supplementary material for: Effects of Extracts from Thai Piperaceae Plants against Infection with Toxoplasma gondii
Source: PubMed Central journal article supplement (PMC4877092; doi:10.1371/journal.pone.0156116), 2016-05-23
Supplement: pone.0156116.s001.pdf [file pone.0156116.s001.pdf]

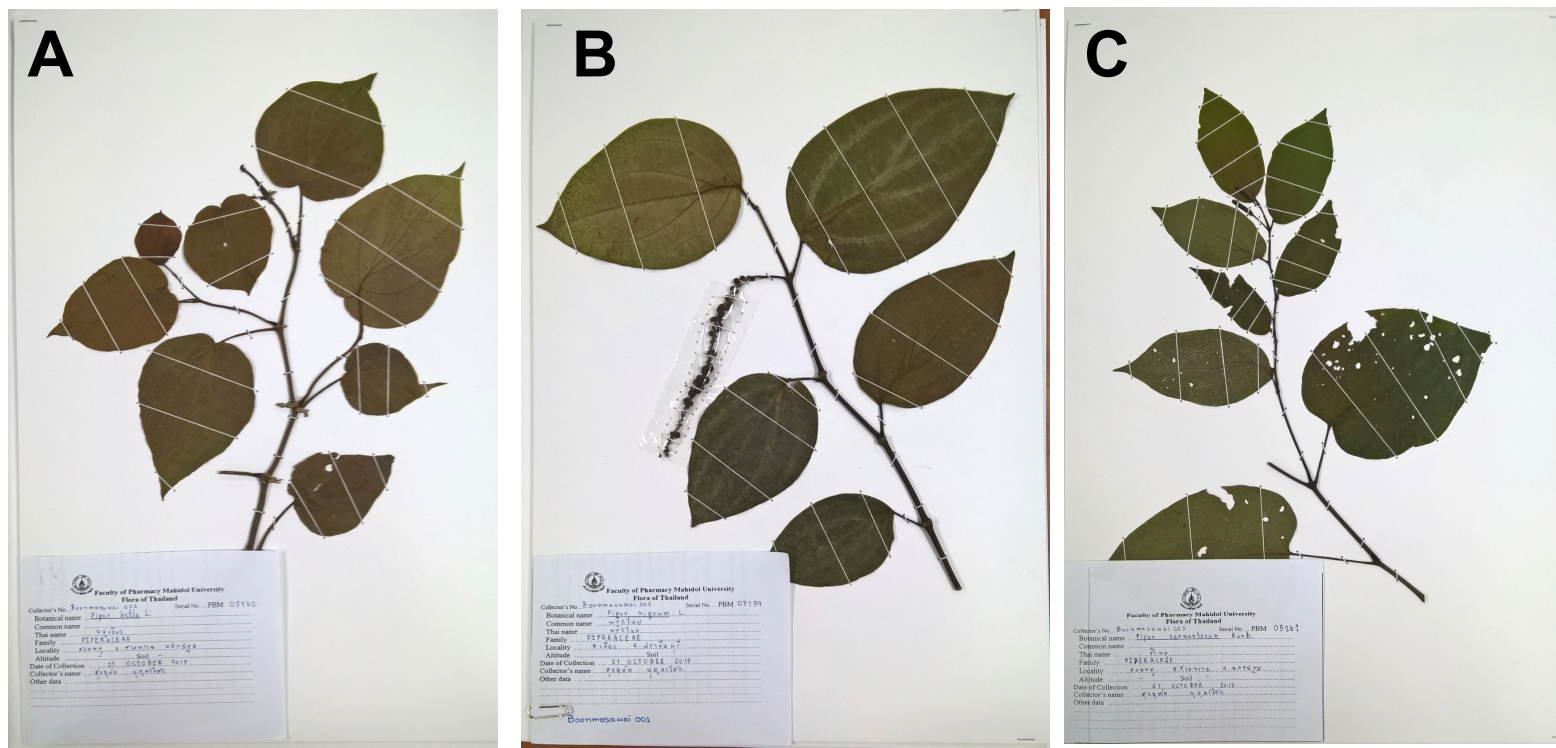

**S1 Fig. Plant materials** (A) *Piper betle* L., (B) *Piper nigrum* L., and (C) *Piper sarmentosum* Roxb. were identified and transferred to the herbarium by the Faculty of Pharmacy, Mahidol University, 447 Sri-Ayuthaya Road, Rajathevi Bangkok 10400, Thailand. The serial numbers given were as follows: *P. betle* L.: PBM05160, *P. nigrum* L.: PBM05159, *P. sarmentosum* Roxb.: PBM05161.
