# Supplementary material for: Effects of Extracts from Thai Piperaceae Plants against Infection with Toxoplasma gondii
Source: PubMed Central journal article supplement (PMC4877092; doi:10.1371/journal.pone.0156116), 2016-05-23
Supplement: pone.0156116.s002.pdf [file pone.0156116.s002.pdf]

**A**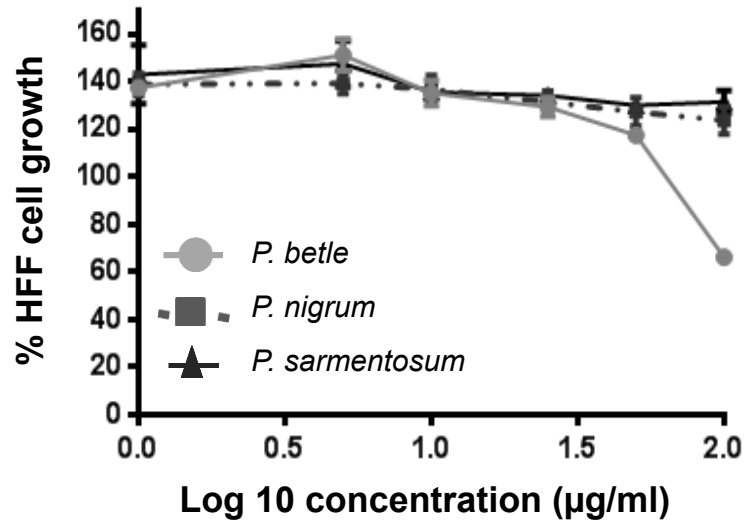**B**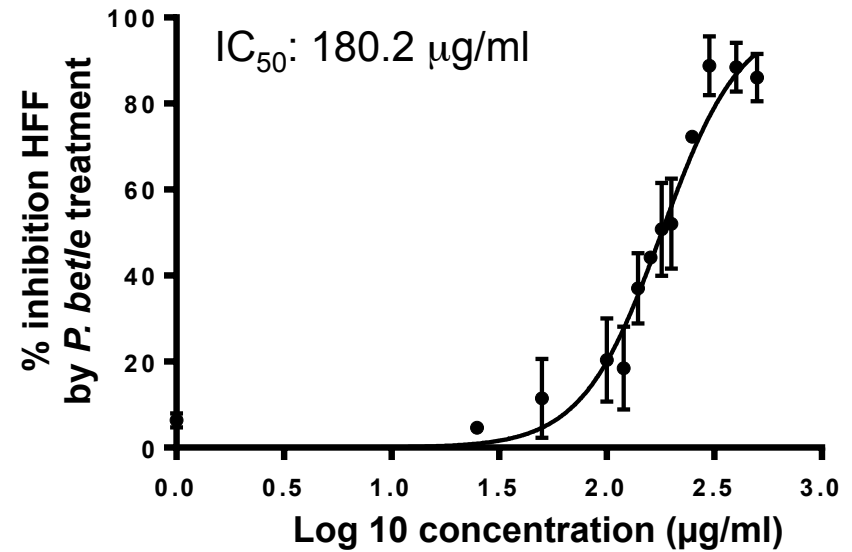

**S2 Fig. Cytotoxicity of the piperaceae extracts** (A) Cytotoxicity testing of HFF cells after treatment with either one of three piperaceae extracts (*P. betle*, *P. nigrum*, or *P. sarmentosum*) at concentrations of 0 to 100 µg/mL for 24 h. Data represent the mean values  $\pm$  SD for three independent experiments. (B) Inhibition HFF cell growth by the *P. betle* extract. HFF cells were exposed to *P. betle* extract at concentrations 0 to 500 µg/mL. Data represent the mean values  $\pm$  SD for three independent experiments. The IC<sub>50</sub> value of the *P. betle* extract on HFF cells was calculated based on three independent experiments performed together.
